# Supplementary material for: Screening Active Compounds fromGarciniaSpecies Native to China Reveals Novel Compounds Targeting the STAT/JAK Signaling Pathway
Source: Hindawi journal article supplement (doi:10.1155/2015/910453), 2015-01-01
Supplement: f1 [file 910453.f1.pdf]

Table S1: Source and structure for 64 compounds from Garcinia plant

| Compound | Name                                                | Source                            | Structure                                                                             |
|----------|-----------------------------------------------------|-----------------------------------|---------------------------------------------------------------------------------------|
| bn-1     | Garcinone E                                         | <i>Garcinia xishuanbannaensis</i> | 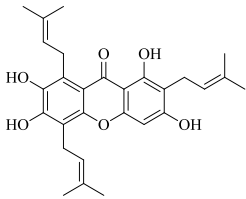   |
| bn-10    | 1,3,6,7-tetrahydroxy-8-(3-methylbut-2-enyl)xanthone | <i>Garcinia xishuanbannaensis</i> |    |
| bn-16    | Garcinone C                                         | <i>Garcinia xishuanbannaensis</i> |    |
| bn-17    | Bannaxanthone B                                     | <i>Garcinia xishuanbannaensis</i> |   |
| bn-2     | Allanxanthone C                                     | <i>Garcinia xishuanbannaensis</i> |  |
| bn-21    | Bannaxanthone G                                     | <i>Garcinia xishuanbannaensis</i> |  |
| bn-3     | Bannaxanthone E                                     | <i>Garcinia xishuanbannaensis</i> |  |
| bn-4     | Bannaxanthone D                                     | <i>Garcinia xishuanbannaensis</i> |  |

|      |                                                                                |                          |                                                                                       |
|------|--------------------------------------------------------------------------------|--------------------------|---------------------------------------------------------------------------------------|
| C-6  | 1,5,6-Trihydroxy-2-prenyl-6',6'-dimethyl-2 <i>H</i> -pyrano(2',3':3,4)xanthone | <i>Garcinia cowa</i>     | 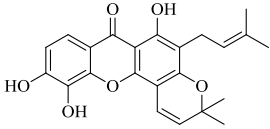   |
| GB11 | <i>S</i> -gambogic acid                                                        | <i>Garcinia hanburyi</i> |    |
| GB14 | <i>R/S</i> -isogambogic acid                                                   | <i>Garcinia hanburyi</i> |    |
| GB16 | Gambogenic acid                                                                | <i>Garcinia hanburyi</i> |   |
| GB18 | Isomorellinol                                                                  | <i>Garcinia hanburyi</i> |  |
| GB19 | Gambogic acid B                                                                | <i>Garcinia hanburyi</i> |  |
| GB27 | Isomorellic acid                                                               | <i>Garcinia hanburyi</i> |  |
| GB32 | Desoxygambogenin                                                               | <i>Garcinia hanburyi</i> |  |

|       |                                                  |                           |                                                                                       |
|-------|--------------------------------------------------|---------------------------|---------------------------------------------------------------------------------------|
| GB35  | Forbesione                                       | <i>Garcinia hanburyi</i>  | 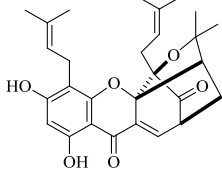   |
| GB39  | S-33-hydroxygambogic acid                        | <i>Garcinia hanburyi</i>  |    |
| GB40  | S-35-hydroxygambogic acid                        | <i>Garcinia hanburyi</i>  |    |
| GB49  | Isogambogenin                                    | <i>Garcinia hanburyi</i>  |    |
| GB63  | Isogambogenic acid                               | <i>Garcinia hanburyi</i>  |  |
| GB8   | R/S-gambogic acid                                | <i>Garcinia hanburyi</i>  |  |
| Ge-1  | 1,3,7-trihydroxy-2-(3-methylbut-2-enyl)-xanthone | <i>Garcinia esculenta</i> |  |
| Ge-10 | Toxyloxanthone B                                 | <i>Garcinia esculenta</i> |  |
| Ge-15 | 1,3,5,7-tetrahydroxy-8-isoprenyl xanthone        | <i>Garcinia esculenta</i> |  |

|         |                                                                                     |                            |                                                                                       |
|---------|-------------------------------------------------------------------------------------|----------------------------|---------------------------------------------------------------------------------------|
| Ge-17   | 1,3,6,7-tetrahydroxyxanthone                                                        | <i>Garcinia esculenta</i>  | 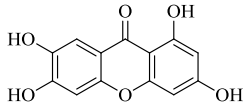   |
| Ge23    | Guttiferone F                                                                       | <i>Garcinia esculenta</i>  |    |
| Ge27    | Garcimultiflorone E                                                                 | <i>Garcinia esculenta</i>  |    |
| Ge-3    | Griffipavixanthone                                                                  | <i>Garcinia esculenta</i>  |    |
| Ge-6    | Cambogin                                                                            | <i>Garcinia esculenta</i>  |   |
| Ge6-3   | Garciniagifolone A                                                                  | <i>Garcinia esculenta</i>  |  |
| Ge9     | $\gamma$ -mangostin                                                                 | <i>Garcinia esculenta</i>  |  |
| gl-11-1 | 1,6,7-trihydroxy-6,6'-dimethyl-2H-pyrano(2',3':,3,2)-4-(3-methylbut-2-enyl)xanthone | <i>Garcinia lancilimba</i> |  |

|       |                                               |                            |  |
|-------|-----------------------------------------------|----------------------------|--|
| gl-12 | Nigrolineaxanthone V                          | <i>Garcinia lancilimba</i> |  |
| gl-14 | 30-epicambogin                                | <i>Garcinia lancilimba</i> |  |
| gl-16 | 1,3,5-trihydroxy- 6-methoxy-7-prenylxanthone  | <i>Garcinia lancilimba</i> |  |
| gl-17 | 1,5,6-trihydroxy- 3-methoxy- 4-prenylxanthone | <i>Garcinia lancilimba</i> |  |
| gl-18 | Isojacareubin                                 | <i>Garcinia lancilimba</i> |  |
| gl-20 | 1,7-dihydroxyxanthone                         | <i>Garcinia lancilimba</i> |  |
| gl-23 | 1,5,6-trihydroxyxanthone                      | <i>Garcinia lancilimba</i> |  |
| gl-25 | Macurin                                       | <i>Garcinia lancilimba</i> |  |
| gl-34 | Taxfolin                                      | <i>Garcinia lancilimba</i> |  |

|       |                                                          |                              |                                                                                       |
|-------|----------------------------------------------------------|------------------------------|---------------------------------------------------------------------------------------|
| gl-6  | 1,3-dihydroxy- 5,6-dimethoxy- 7-prenylxanthone           | <i>Garcinia lancilimba</i>   | 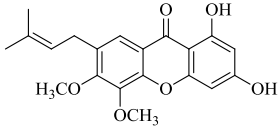   |
| gl-7  | (+) guttiferone B                                        | <i>Garcinia lancilimba</i>   |    |
| gl-9  | Dulxanthone B                                            | <i>Garcinia lancilimba</i>   |    |
| gly-2 | (2S)-eriodictyol-7-O-β-D-glucopyranosiduronic acid       | <i>Garcinia lancilimba</i>   |    |
| gly-3 | (2S)-eriodictyol 7-O-β-D-glucuronide ethyl ester         | <i>Garcinia lancilimba</i>   |    |
| gly-5 | (2S)-eriodictyol 7-O-β-D-glucuronide methyl ester        | <i>Garcinia lancilimba</i>   |  |
| Go-11 | 1,3,5-trihydroxy-13,13-dimethyl-2H-pyran(7,6-b) xanthone | <i>Garcinia oblongifolia</i> |  |
| Go-14 | Leiaxanthone                                             | <i>Garcinia oblongifolia</i> |  |
| Go-15 | Parvifolixanthone B                                      | <i>Garcinia oblongifolia</i> |  |
| Go-16 | Rheediaxanthone A                                        | <i>Garcinia oblongifolia</i> |  |

|        |                      |                              |  |
|--------|----------------------|------------------------------|--|
| Go-23  | Oblongixanthone C    | <i>Garcinia oblongifolia</i> |  |
| Go-24  | Oblongifolin C       | <i>Garcinia oblongifolia</i> |  |
| Go-24a | Oblongifolin D       | <i>Garcinia oblongifolia</i> |  |
| Go-9   | Nigrolineaxanthone T | <i>Garcinia oblongifolia</i> |  |
| Gof1   | Garcihombronone D    | <i>Garcinia oblongifolia</i> |  |
| Gof3   | Euxanthone           | <i>Garcinia oblongifolia</i> |  |
| Gxc-3  | Xanthone V1          | <i>Garcinia cowa</i>         |  |
| Gxy-11 | Oblongifolin A       | <i>Garcinia yunnanensis</i>  |  |
| Gxy-4  | Guttiiferone K       | <i>Garcinia yunnanensis</i>  |  |
| N-7    | Nujiangexanthone A   | <i>Garcinia nujiangensis</i> |  |

|      |                                                   |                             |                                                                                     |
|------|---------------------------------------------------|-----------------------------|-------------------------------------------------------------------------------------|
| WZ-4 | Moreloflavone                                     | <i>Garcinia yunnanensis</i> | 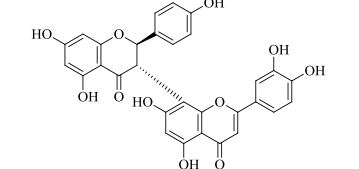 |
| WZ-6 | Apigenin-7-O- $\beta$ -D-glucuronide methyl ester | <i>Garcinia yunnanensis</i> |  |



Table S2: Percent Inhibition data of 64 compounds at the 20 micromolar against 36 cancer cell lines in pre-screen study.

| Cell Type\Compound | bn-1       | bn-10 | bn-16 | bn-17 | bn-2 | bn-21 | bn-3 | bn-4 | C-6 | GB11 | GB14 | GB16 | GB18 | GB19 | GB27 | GB32 | GB35 | GB39 | GB40 | GB49 | GB63 | GB8 | Ge-1 | Ge-10 | Ge-15 | Ge-17 | Ge-23 | Ge-27 | Ge-3 | Ge-6 | Ge-6-3 | Ge-9 | g <sup>8</sup> -11-1 | g <sup>8</sup> -11-1 | g <sup>8</sup> -12 | g <sup>8</sup> -14 | g <sup>8</sup> -16 | g <sup>8</sup> -17 | g <sup>8</sup> -18 | g <sup>8</sup> -20 | g <sup>8</sup> -23 | g <sup>8</sup> -25 | g <sup>8</sup> -34 | g <sup>8</sup> -6 | g <sup>8</sup> -7 | g <sup>8</sup> -9 | g <sup>8</sup> -2 | g <sup>8</sup> -3 | g <sup>8</sup> -5 | Go-11 | Go-14 | Go-15 | Go-16 | Go-23 | Go-24 | Go-24a | Go-9 | Gof1 | Gof3 | Goc-3 | Gcy-11 | Gcy-4 | N-7 | WZ-4 | WZ-6 |
|--------------------|------------|-------|-------|-------|------|-------|------|------|-----|------|------|------|------|------|------|------|------|------|------|------|------|-----|------|-------|-------|-------|-------|-------|------|------|--------|------|----------------------|----------------------|--------------------|--------------------|--------------------|--------------------|--------------------|--------------------|--------------------|--------------------|--------------------|-------------------|-------------------|-------------------|-------------------|-------------------|-------------------|-------|-------|-------|-------|-------|-------|--------|------|------|------|-------|--------|-------|-----|------|------|
| Lung               | A498       | 98    | 25    | 65    | 54   | 34    | 60   | 96   | 84  | 10   | 98   | 97   | 100  | 93   | 99   | 88   | 93   | 99   | 98   | 88   | 98   | 99  | 54   | 33    | 46    | 41    | 45    | 53    | 78   | 97   | 98     | 98   | -2                   | 11                   | 95                 | 34                 | 75                 | 74                 | 38                 | 3                  | -10                | 2                  | 47                 | 51                | 86                | -7                | -4                | -12               | 37                | -2    | 78    | 12    | 94    | 81    | 43    | 64     | 6    | 39   | 90   | 65    | 74     | 13    | 4   | 13   |      |
|                    | ChaGo-K-1  | 99    | 18    | 91    | 73   | 75    | 95   | 97   | 93  | 7    | 98   | 98   | 99   | 99   | 99   | 98   | 99   | 99   | 100  | 98   | 99   | 100 | 99   | 44    | 26    | 36    | 22    | 55    | 77   | 97   | 98     | 98   | 97                   | -17                  | 38                 | 96                 | 57                 | 87                 | 91                 | 57                 | -22                | -26                | -3                 | 59                | 94                | 97                | -33               | -13               | -10               | 75    | -16   | 11    | 9     | 94    | 97    | 94     | 94   | -21  | 12   | 99    | 89     | 97    | 4   | -14  | -16  |
|                    | MSTO-211-H | 98    | 4     | 93    | 70   | 72    | 90   | 98   | 94  | 1    | 98   | 97   | 100  | 99   | 99   | 99   | 99   | 99   | 100  | 98   | 99   | 99  | 100  | 44    | 48    | 34    | 74    | 50    | 76   | 96   | 99     | 93   | 98                   | 0                    | -5                 | 97                 | 61                 | 79                 | 85                 | 59                 | -25                | -30                | -9                 | 16                | 89                | 98                | 7                 | -3                | -6                | 66    | 11    | 69    | 34    | 95    | 97    | 91     | 92   | 14   | 36   | 98    | 82     | 95    | -1  | 6    | 6    |
|                    | NCI-H1623  | 91    | -10   | 67    | 20   | 49    | 72   | 95   | 80  | -13  | 98   | 98   | 99   | 99   | 99   | 98   | 99   | 100  | 99   | 99   | 99   | 99  | 9    | 12    | -16   | 2     | -2    | 10    | 94   | 99   | 98     | 91   | 16                   | 5                    | 97                 | 18                 | 41                 | 77                 | -13                | 0                  | 0                  | -7                 | 14                 | 83                | 85                | 6                 | 8                 | 7                 | -10               | -10   | 78    | 33    | 92    | 98    | 94    | 63     | -13  | -7   | 88   | 63    | 81     | -8    | -15 | -8   |      |
|                    | NCI-H1694  | 100   | 28    | 99    | 96   | 99    | 100  | 99   | 97  | 19   | 99   | 98   | 100  | 99   | 99   | 99   | 100  | 100  | 99   | 100  | 100  | 100 | 49   | 32    | 68    | 99    | 50    | 95    | 99   | 100  | 99     | 99   | 1                    | 28                   | 99                 | 55                 | 98                 | 98                 | 86                 | -9                 | -12                | 10                 | 46                 | 100               | 100               | -10               | 1                 | -2                | 73                | -3    | 97    | 5     | 98    | 99    | 100   | 100    | 25   | 29   | 100  | 100   | 100    | 25    | -10 | -9   |      |
|                    | NCI-H1770  | 93    | 0     | 87    | 12   | 90    | 94   | 98   | 75  | 5    | 98   | 97   | 100  | 99   | 99   | 99   | 99   | 100  | 100  | 99   | 99   | 99  | 100  | 13    | 3     | -4    | 72    | 8     | 45   | 92   | 99     | 99   | 98                   | 12                   | 34                 | 99                 | 21                 | 40                 | 89                 | -4                 | -11                | -10                | 0                  | 23                | 99                | 93                | -4                | -10               | -6                | 38    | -4    | 75    | 25    | 98    | 99    | 98     | 53   | 11   | 17   | 96    | 91     | 98    | -6  | -10  | -1   |
|                    | NCI-H2347  | 79    | 9     | 73    | 23   | 40    | 75   | 89   | 53  | 7    | 98   | 97   | 98   | 97   | 98   | 93   | 98   | 97   | 99   | 98   | 98   | 98  | 99   | 32    | 22    | 10    | 4     | 29    | 54   | 60   | 71     | 74   | 89                   | 5                    | 9                  | 74                 | 42                 | 86                 | 84                 | 48                 | -8                 | -13                | 2                  | 22                | 63                | 82                | -2                | 4                 | 1                 | 10    | -2    | 51    | -8    | 68    | 59    | 58     | 52   | 0    | 20   | 80    | 66     | 67    | -18 | -4   | -3   |
| Breast             | NCI-H2405  | 93    | -8    | 73    | 7    | 40    | 80   | 96   | 92  | -5   | 98   | 97   | 99   | 99   | 99   | 98   | 99   | 99   | 100  | 99   | 99   | 99  | 99   | 7     | -4    | -11   | -5    | -5    | 11   | 86   | 99     | 98   | 96                   | 5                    | 11                 | 98                 | 12                 | 19                 | 66                 | -5                 | -14                | -9                 | -5                 | 25                | 81                | 93                | -2                | -3                | 5                 | 3     | -10   | 50    | 27    | 98    | 98    | 88     | 72   | -13  | -13  | 93    | 70     | 95    | -7  | -14  | -12  |
|                    | NCI-H28    | 95    | 12    | 71    | 69   | 52    | 73   | 95   | 85  | 12   | 99   | 97   | 99   | 98   | 99   | 99   | 90   | 93   | 99   | 98   | 97   | 99  | 99   | 23    | 10    | 27    | 9     | 38    | 55   | 79   | 91     | 89   | 97                   | -13                  | 2                  | 82                 | 41                 | 76                 | 77                 | 24                 | -10                | -9                 | -11                | 39                | 65                | 86                | -21               | -18               | -17               | 33    | -3    | 74    | 9     | 82    | 82    | 64     | 70   | 11   | 27   | 93    | 67     | 76    | 21  | 0    | 6    |
|                    | NCI-H524   | 100   | -20   | 98    | -19  | 97    | 100  | 99   | 98  | -61  | 97   | 98   | 98   | 100  | 99   | 99   | 99   | 100  | 100  | 99   | 100  | 98  | 98   | 42    | 38    | -54   | 47    | -7    | 97   | 99   | 99     | 98   | 97                   | 10                   | -2                 | 99                 | 56                 | 98                 | 96                 | 91                 | -30                | -74                | -31                | 9                 | 100               | 99                | -15               | -25               | -5                | 83    | -5    | 98    | -35   | 98    | 98    | 99     | 100  | 2    | 18   | 100   | 5      | 100   | -30 | -18  | -11  |
|                    | BT-474     | 87    | -3    | 83    | 27   | 22    | 88   | 90   | 83  | -18  | 98   | 98   | 99   | 99   | 99   | 98   | 99   | 99   | 100  | 99   | 99   | 99  | 99   | 30    | -25   | 9     | -7    | 3     | 25   | 94   | 91     | 84   | 97                   | -18                  | -2                 | 94                 | 16                 | 89                 | 92                 | 50                 | -16                | -3                 | -15                | 25                | 66                | 94                | -18               | -24               | -15               | 31    | -23   | 82    | -6    | 70    | 83    | 68     | 77   | -21  | 7    | 94    | 56     | 80    | -21 | -5   | -12  |
|                    | BT-549     | 98    | -4    | 74    | 34   | 54    | 70   | 97   | 96  | -6   | 99   | 98   | 99   | 99   | 99   | 98   | 99   | 100  | 100  | 99   | 99   | 99  | 100  | 20    | 7     | 6     | 40    | 9     | 49   | 95   | 95     | 93   | 97                   | -12                  | -2                 | 97                 | 27                 | 65                 | 86                 | 46                 | -16                | -10                | -9                 | 14                | 83                | 96                | -14               | -14               | -12               | 46    | -16   | 87    | -5    | 96    | 96    | 78     | 68   | -6   | 16   | 96    | 68     | 79    | -14 | -12  | -16  |
|                    | HCC1395    | 100   | 8     | 94    | 83   | 84    | 95   | 98   | 96  | 14   | 98   | 98   | 99   | 99   | 99   | 99   | 99   | 100  | 100  | 98   | 99   | 99  | 99   | 55    | 45    | 43    | 48    | 37    | 59   | 91   | 92     | 91   | 94                   | -6                   | 21                 | 92                 | 36                 | 72                 | 83                 | 39                 | -4                 | -8                 | -6                 | 31                | 65                | 90                | -2                | -4                | 2                 | 35    | -3    | 70    | 20    | 94    | 86    | 69     | 65   | 11   | 10   | 93    | 61     | 78    | -9  | 6    | 4    |
|                    | HCC1569    | 96    | 16    | 81    | 51   | 63    | 76   | 97   | 92  | 7    | 99   | 98   | 99   | 99   | 99   | 99   | 99   | 100  | 100  | 99   | 99   | 99  | 100  | 52    | 21    | 24    | 16    | 9     | 62   | 98   | 98     | 95   | 97                   | 1                    | 19                 | 98                 | 50                 | 74                 | 81                 | 57                 | 0                  | 1                  | 3                  | 34                | 83                | 93                | -6                | -8                | -7                | 41    | 2     | 86    | 11    | 97    | 95    | 80     | 86   | 2    | 29   | 94    | 75     | 84    | 5   | -17  | -18  |
| Urinary bladder    | HCC1599    | 98    | 77    | 94    | 84   | 79    | 97   | 98   | 97  | 52   | 99   | 98   | 100  | 99   | 99   | 99   | 100  | 100  | 100  | 99   | 99   | 99  | 100  | 54    | 30    | 78    | 79    | 23    | 85   | 96   | 98     | 93   | 95                   | -15                  | 52                 | 98                 | 67                 | 93                 | 92                 | 83                 | 18                 | 11                 | 42                 | 42                | 90                | 95                | -8                | -18               | -41               | 49    | 0     | 62    | 41    | 98    | 94    | 86     | 93   | 5    | 36   | 98    | 87     | 90    | 8   | 8    | 12   |
|                    | HCC1957    | 97    | 32    | 80    | 58   | 75    | 92   | 98   | 89  | 21   | 98   | 98   | 100  | 98   | 99   | 99   | 99   | 100  | 100  | 99   | 99   | 100 | 100  | 11    | 19    | 43    | 65    | 44    | 74   | 97   | 99     | 96   | 98                   | -2                   | -7                 | 98                 | 50                 | 83                 | 85                 | 62                 | -1                 | 0                  | 8                  | 32                | 94                | 94                | -2                | 3                 | 1                 | 21    | 3     | 85    | 25    | 96    | 97    | 95     | 85   | 9    | 8    | 95    | 88     | 95    | -5  | 0    | 3    |
|                    | T47D       | 82    | 4     | 62    | 45   | 54    | 64   | 96   | 80  | 6    | 99   | 98   | 99   | 99   | 99   | 99   | 99   | 100  | 100  | 99   | 99   | 99  | 100  | 45    | 26    | 43    | 48    | 37    | 59   | 91   | 92     | 91   | 94                   | -6                   | 21                 | 92                 | 36                 | 72                 | 83                 | 39                 | -4                 | -8                 | -6                 | 31                | 65                | 90                | -2                | -4                | 2                 | 35    | -3    | 70    | 20    | 94    | 86    | 69     | 65   | 11   | 10   | 93    | 61     | 78    | -9  | 6    | 4    |
|                    | ZR-75-30   | 99    | 77    | 94    | 81   | 86    | 99   | 99   | 81  | 64   | 99   | 99   | 100  | 99   | 99   | 99   | 99   | 100  | 100  | 99   | 100  | 99  | 99   | 81    | 65    | 85    | 6     | 74    | 89   | 99   | 100    | 99   | 99                   | 28                   | 54                 | 99                 | 93                 | 98                 | 95                 | 87                 | 16                 | -3                 | 14                 | 90                | 99                | 99                | 15                | 13                | 7                 | 62    | -20   | 83    | 47    | 95    | 94    | 98     | 90   | 17   | 41   | 100   | 91     | 100   | -11 | 8    | -2   |
|                    | HT-1197    | 97    | 8     | 85    | 44   | 38    | 91   | 98   | 89  | 20   | 98   | 98   | 99   | 99   | 99   | 95   | 99   | 96   | 100  | 99   | 96   | 99  | 99   | 50    | 44    | 31    | 16    | 43    | 53   | 88   | 90     | 90   | 97                   | 15                   | 20                 | 90                 | 37                 | 95                 | 90                 | 77                 | -11                | 5                  | 10                 | 36                | 90                | 97                | -8                | 11                | 0                 | 39    | -3    | 51    | 35    | 96    | 90    | 91     | 76   | 1    | 28   | 98    | 75     | 82    | 13  | -4   | 16   |
|                    | JR2        | 98    | 29    | 85    | 52   | 43    | 88   | 98   | 94  | 13   | 98   | 97   | 99   | 99   | 99   | 98   | 99   | 99   | 100  | 99   | 98   | 99  | 99   | 38    | 21    | 44    | 47    | 37    | 54   | 93   | 97     | 83   | 97                   | 4                    | 17                 | 95                 | 50                 | 88                 | 88                 | 60                 | -2                 | 1                  | 3                  | 52                | 92                | 99                | -6                | -7                | -8                | 52    | -8    | 74    | 23    | 97    | 96    | 90     | 80   | 10   | 20   | 99    | 66     | 82    | 17  | -5   | -5   |
|                    | TCCSUP     | 97    | 33    | 88    | 79   | 75    | 84   | 96   | 92  | 11   | 99   | 98   | 100  | 99   | 99   | 99   | 99   | 100  | 100  | 99   | 99   | 99  | 100  | 28    | 28    | 49    | 61    | 43    | 75   | 94   | 97     | 99   | 99                   | 11                   | 11                 | 97                 | 63                 | 83                 | 85                 | 67                 | -5                 | -5                 | 4                  | 36                | 91                | 96                | -4                | -1                | -11               | 43    | 6     | 88    | 44    | 93    | 96    | 81     | 84   | 14   | 32   | 98    | 88     | 89    | 18  | 3    | 8    |
| Uterus             | Colo 205   | 98    | 19    | 97    | 57   | 69    | 100  | 99   | 93  | 3    | 98   | 98   | 99   | 99   | 99   | 99   | 99   | 100  | 100  | 99   | 100  | 99  | 99   | 29    | 16    | 21    | 3     | 47    | 93   | 99   | 97     | 98   | 98                   | 6                    | 10                 | 98                 | 57                 | 97                 | 96                 | 3                  | -5                 | -1                 | 1                  | 43                | 99                | 97                | -6                | -6                | -4                | 11    | 8     | 89    | 4     | 96    | 97    | 98     | 70   | 1    | 22   | 99    | 97     | 99    | 9   | -6   | 4    |
|                    | RL95       | 99    | 15    | 69    | 45   | 70    | 88   | 98   | 96  | 9    | 99   | 97   | 99   | 99   | 99   | 98   | 99   | 100  | 100  | 99   | 99   | 99  | 100  | 37    | 9     | 32    | 53    | 10    | 75   | 98   | 98     | 96   | 98                   | -8                   | 23                 | 97                 | 45                 | 87                 | 94                 | 67                 | -20                | -8                 | 3                  | 46                | 85                | 98                | 2                 | 6                 | 6                 | 72    | -5    | 94    | -8    | 97    | 94    | 89     | 94   | -4   | 42   | 99    | 81     | 96    | -16 | -2   | -5   |
|                    | HEC-1-A    | 87    | 22    | 61    | 46   | 51    | 71   | 88   | 76  | 1    | 99   | 97   | 99   | 99   | 99   | 99   | 99   | 100  | 100  | 99   | 99   | 99  | 100  | 26    | 25    | 25    | 51    | 23    | 57   | 73   | 83     | 85   | 95                   | 3                    | 13                 | 87                 | 46                 | 76                 | 81                 | 41                 | -6                 | 5                  | -5                 | 40                | 68                | 85                | -19               | -19               | -16               | 38    | -6    | 67    | 11    | 76    | 81    | 67     | 72   | -4   | 19   | 88    | 64     | 76    | -17 | 10   | 1    |
| Brain              | CCF-STTG1  | 89    | 8     | 65    | 43   | 52    | 68   | 93   | 86  | 16   | 98   | 98   | 99   | 99   | 99   | 99   | 99   | 100  | 100  | 99   | 99   | 99  | 99   | 43    | 18    | 17    | 15    | 30    | 42   | 94   | 87     | 92   | 99                   | 12                   | 16                 | 87                 | 25                 | 74                 | 81                 | 49                 | -1                 | 9                  | 4                  | 45                | 72                | 92                | 1                 | -4                | 8                 | 44    | -1    | 84    | 22    | 87    | 77    | 55     | 91   | 11   | 31   | 92    | 69     | 82    | 6   | 0    | -3   |
|                    | M          |       |       |       |      |       |      |      |     |      |      |      |      |      |      |      |      |      |      |      |      |     |      |       |       |       |       |       |      |      |        |      |                      |                      |                    |                    |                    |                    |                    |                    |                    |                    |                    |                   |                   |                   |                   |                   |                   |       |       |       |       |       |       |        |      |      |      |       |        |       |     |      |      |

**Figure S1**

**A.**

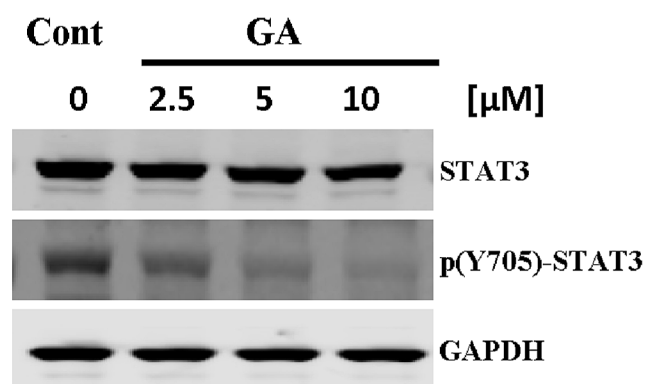

**NCI-H1650**

**B.**

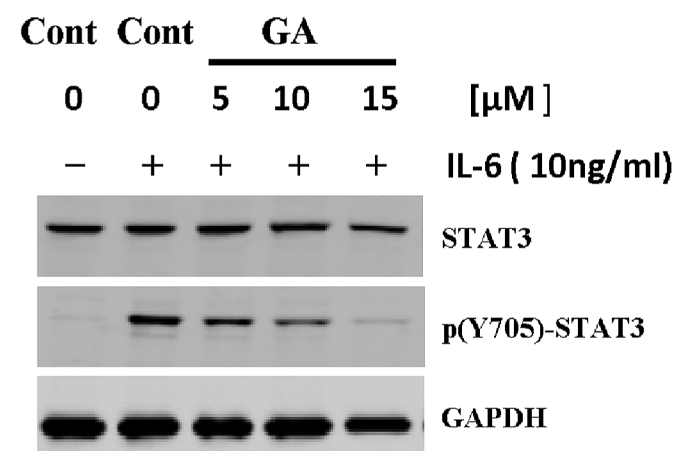

**HepG2**
